# Supplementary material for: Cardiovascular Complications of COVID-19 among Pregnant Women and Their Fetuses: A Systematic Review
Source: MDPI journal article supplement (doi:10.3390/jcm11206194), 2022-10-20
Supplement: s1 [file s1]

Table S1. Quality assessment of the included cohort, case-control, (and cross-sectional) studies

| Author (ref.)               | selection |   |   |    | comparability | outcome |   |   | Total score | Total Quality |
|-----------------------------|-----------|---|---|----|---------------|---------|---|---|-------------|---------------|
|                             | 1         | 2 | 3 | 4  | 1             | 1       | 2 | 3 |             |               |
| Adhikari et al. [31]        | *         | * | * | *  | *             | *       | * | * | 8           | Good          |
| Anuk et al. [32]            | *         | * | * | *  | *             | *       | * |   | 7           | Good          |
| Wu Y [33]                   | *         | * | * | *  |               | *       | * | * | 7           | Fair          |
| Pachtman et al. [34]        | *         | * | * | *  |               | *       | * | * | 7           | Fair          |
| Berengueet et al. [35]      | *         | * | * | *  |               | *       | * | * | 7           | Fair          |
| Brandt et al. [36]          | *         | * | * | *  | **            | *       | * | * | 9           | Good          |
| Jering et al. [37]          | *         | * | * | *  | *             | *       | * | * | 8           | Good          |
| Soto-Torres et al. [38]     | *         | * | * | *  | **            | *       | * | * | 9           | Good          |
| Sule et al. [42]            | *         | * | * |    | *             | *       | * | * | 7           | Good          |
| Rosenbloom et al. [39]      | *         | * | * |    | **            | *       | * |   | 7           | Good          |
| Mahajan et al. [15]         | *         | * | * |    | *             | *       | * | * | 7           | Good          |
| Melguizo et al. [16]        | *         | * | * | *  | *             | *       | * | * | 8           | Good          |
| Mendoza et al. [17]         | *         | * | * | *  | **            | *       | * | * | 9           | Good          |
| Mercedes et al. [18]        | *         | * | * |    | **            | *       | * | * | 8           | Good          |
| Molteni et al. [19]         | *         | * | * |    | *             | *       | * | * | 7           | Good          |
| Mullins et al. [20]         | *         | * | * | *  | *             | *       | * | * | 8           | Good          |
| Chavan et al. [21]          | *         |   |   |    | **            | **      |   |   | 5           | Satisfactory  |
| Osaikhuwuomwan et al. [22]  | *         |   | * | ** | **            | **      |   |   | 8           | Good          |
| Palomo et al. [23]          | *         | * | * |    | **            | *       | * | * | 8           | Good          |
| Papageorghiou et al. [24]   | *         | * | * |    | **            | *       | * | * | 8           | Good          |
| Pierce-Williams et al. [25] | *         | * | * | *  | **            | *       | * | * | 9           | Good          |
| Pirjani et al. [26]         | *         | * | * |    | *             | *       | * | * | 7           | Good          |
| Rajan et al. [27]           | *         | * | * |    | **            | *       | * |   | 7           | Good          |
| Serrano et al. [28]         | *         |   |   | ** | **            | **      | * |   | 8           | Good          |
| Sinaci et al. [41]          | *         | * | * |    | *             | *       | * | * | 7           | Good          |
| Trilla et al. [29]          | *         | * | * |    | *             | *       | * | * | 7           | Good          |
| Abedzadeh kalahroudi[1]     | *         | * | * |    | **            | *       | * |   | 7           | Good          |
| Antoun et al[2]             | *         | * | * | *  | **            | *       | * |   | 8           | Good          |
| Ahlberg et al[14]           | *         | * | * |    | **            | *       | * |   | 7           | Good          |
| Arslan et al[3]             | *         | * | * | *  | **            | *       | * | * | 9           | Good          |
| Bachani et al[4]            | *         | * | * | *  | *             | *       | * |   | 7           | Fair          |
| Cruz et al[5]               | *         | * | * | *  | **            | *       | * |   | 8           | Good          |

|                       |   |   |   |   |    |   |     |   |      |
|-----------------------|---|---|---|---|----|---|-----|---|------|
| Dalla et al[6]        | * | * | * | * | ** | * | *   | 8 | Good |
| Epelboin et al[7]     | * | * | * |   | ** | * | * * | 8 | Good |
| Ferrera et al[8]      | * | * | * | * | *  | * | *   | 7 | Good |
| Guida et al[9]        | * | * | * |   | ** | * | *   | 7 | Good |
| Gurol et al[10]       | * | * | * |   | ** | * | * * | 8 | Good |
| Hill et al[11]        | * | * | * | * | *  | * | *   | 7 | Good |
| Jayaram et al[12]     | * | * | * | * | ** | * | *   | 8 | Good |
| Knobel et al[13]      | * | * | * |   | ** | * | *   | 7 | Good |
| Goncu Ayhan et al[40] | * | * | * |   | ** | * | *   | 7 | Good |

[illegible]

|                        |         |         |         |         |         |         |         |         |
|------------------------|---------|---------|---------|---------|---------|---------|---------|---------|
| Radoi et al. [60]      | Yes     | Yes     | Yes     | Yes     | Yes     | Yes     | Unclear | yes     |
| Rajan et al. [27]      | Yes     | No      | Unclear | Yes     | No      | Unclear | Unclear | yes     |
| Soofi et al. [61]      | Yes     | unclear |
| Stout et al. [62]      | Yes     | unclear |
| Vaezi et al. [63]      | yes     | No      | No      | Unclear | Unclear | Unclear | Unclear | yes     |
| Yousefzade et al. [30] | Unclear | No      | yes     | yes     | unclear | unclear | unclear | yes     |
| Zarrintan et al. [64]  | Yes     | yes     | unclear | yes     | yes     | yes     | Unclear | yes     |
| Ahmed et al[43]        | yes     | no      | yes     | yes     | yes     | yes     | yes     | unclear |
| Askary et al[44]       | yes     | unclear | yes     | yes     | yes     | yes     | yes     | yes     |
| Azarkish et al[45]     | yes     | unclear |
| Breslin et al[46]      | yes     |
| Dehghan et al[47]      | yes     |
| Cetera et al[48]       | yes     | unclear | yes     | yes     | yes     | yes     | yes     | unclear |
| Donovan et al[49]      | yes     | unclear | yes     | yes     | yes     | yes     | yes     | yes     |
| Franca et al[50]       | yes     | unclear |
| Gara et al[51]         | yes     | unclear | yes     | yes     | yes     | yes     | yes     | unclear |
| Goudarzi et al[52]     | yes     | no      | yes     | yes     | yes     | yes     | yes     | no      |
| Gulersen et al[53]     | yes     | unclear | yes     | yes     | yes     | yes     | yes     | unclear |
| Hansen et al[54]       | yes     | no      | yes     | yes     | yes     | yes     | yes     | unclear |
| Khodamoradi et al[55]  | yes     | no      | yes     | yes     | yes     | yes     | yes     | yes     |
| Gracia perez et al[70] | yes     |
| Gubbar et al[71]       | yes     | unclear | yes     | yes     | yes     | yes     | yes     | no      |
| Kato et al[72]         | yes     | no      | yes     | yes     | yes     | yes     | yes     | unclear |
